# Supplementary material for: The Molecular Chaperone Mechanism of the C-Terminal Domain of Large-Size Subunit Catalases
Source: MDPI journal article supplement (doi:10.3390/antiox12040839), 2023-03-30
Supplement: s1 [file s1]

## Supplementary figures

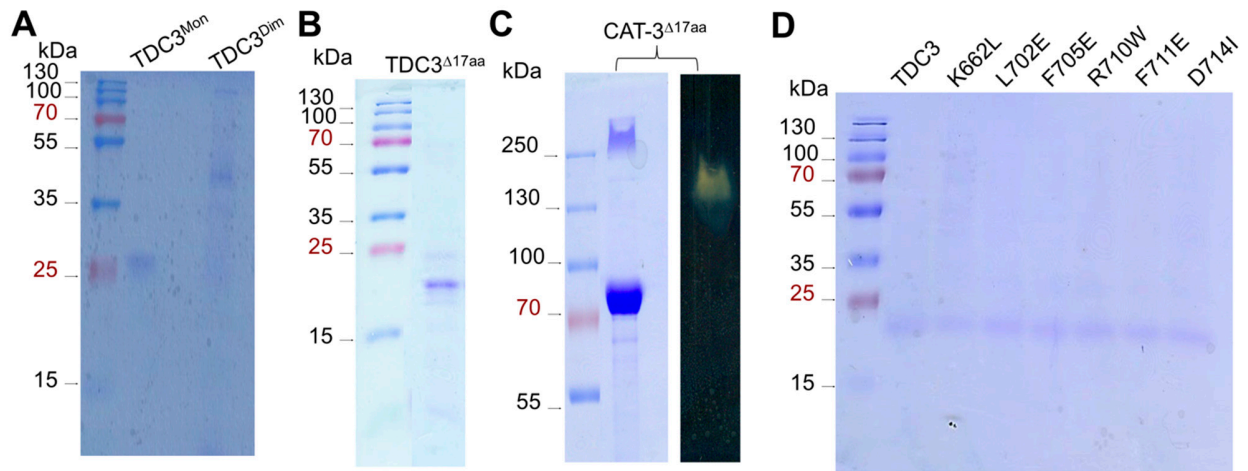

**Figure S1.** SDS-PAGE of TDC3 and CAT-3 variants. A) PAGE of TDC3<sup>Q652C</sup> in monomer and dimer conformation (15 % of acrylamide). B) PAGE of TDC3<sup>Δ17aa</sup> (15 % of acrylamide). B) PAGE of CAT-3<sup>Δ17aa</sup> and in gel catalase activity (8 % of acrylamide); zymogram was run under non-denaturing conditions. C) PAGE of TDC3 single amino acid substitutions (15 % of acrylamide).

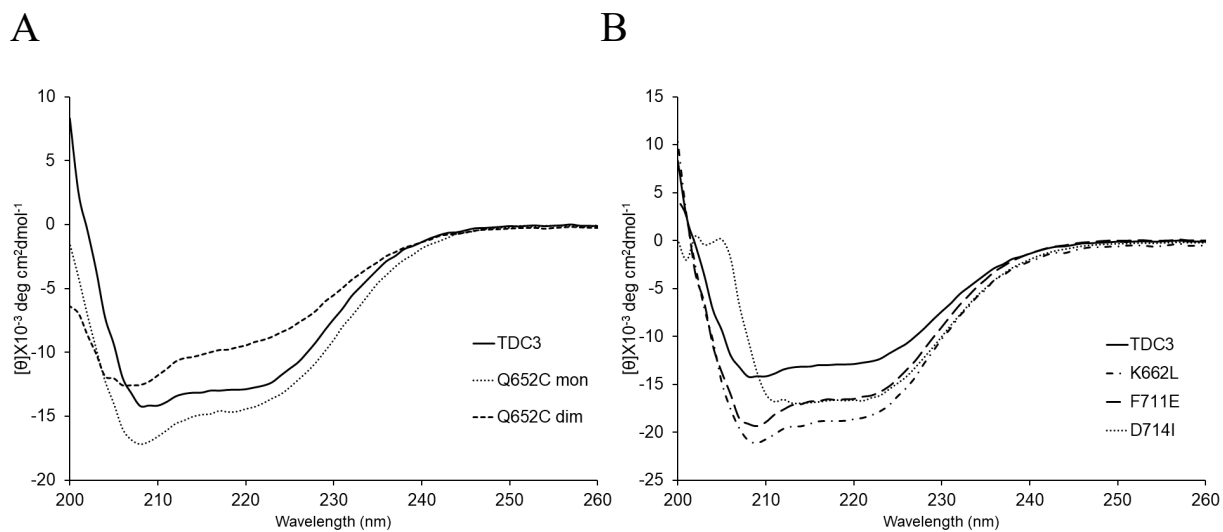

**C** Estimation of structural content by two servers

|           | BestSel (%)    |                |        | K2D2 (%)       |                |        |
|-----------|----------------|----------------|--------|----------------|----------------|--------|
|           | $\alpha$ helix | $\beta$ strand | Others | $\alpha$ helix | $\beta$ strand | Others |
| TDC3      | 88.4           | 9.2            | 2.5    | 84.27          | 1.24           | 14.49  |
| Q652C mon | 65.7           | 10.7           | 23.6   | 84.27          | 1.24           | 14.49  |
| Q652C dim | 50             | 13.9           | 36.1   | 75.57          | 1.72           | 22.71  |
| K662L     | 13.5           | 0              | 86.5   | 84.27          | 1.24           | 14.49  |
| F711E     | 51.5           | 17.1           | 31.1   | 84.27          | 1.24           | 14.49  |
| D714I     | 33.4           | 66.7           | 0      | 84.27          | 1.24           | 14.49  |

**Figure S2.** CD of the TDC3 and estimation of structural content. A) Near UV spectra of the TDC3 monomer and dimer. The TDC3, the TDC3<sup>Q652C</sup> as monomer or as dimer. B) CD of the three TDC3 mutant variants. C) Estimation of structural content using two servers. All TDC3 variants have a similar spectrum with the exception of the TDC3<sup>D714I</sup> which apparently has more alpha helices and less unstructured regions.

A

TDC3 Primary sequence:

TLRVGVLSTTKGGSLDKAKALKEQLEKDGLKVTVIAEYLASGVDQTYSAADATAFDVAVV  
AEGAERVFSGKGAMSPLPAGRPSQILTDGYRWGKPVAAVGSAKKALQSIGVEEKEAGVY  
AGAQDEVIKGVEEGLKVFKFLERFAVDGDDEE

B

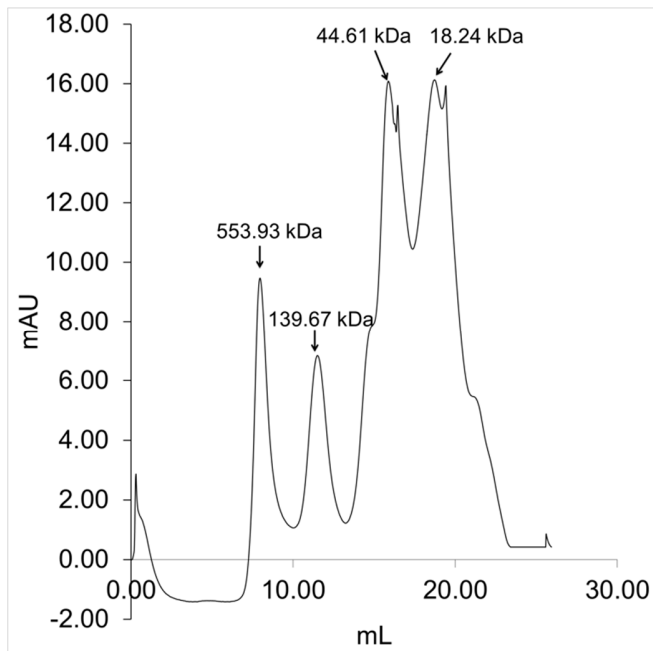

**Figure S3.** Primary sequence and molecular mass of TDC3. A) TDC primary sequence. B) Molecular mass of TDC3 determined by gel filtration chromatography. TDC3, 1mg/ml, was injected on a calibrated Superdex 75 HR 10/300 column. The solid line is the elution profile of TDC3.

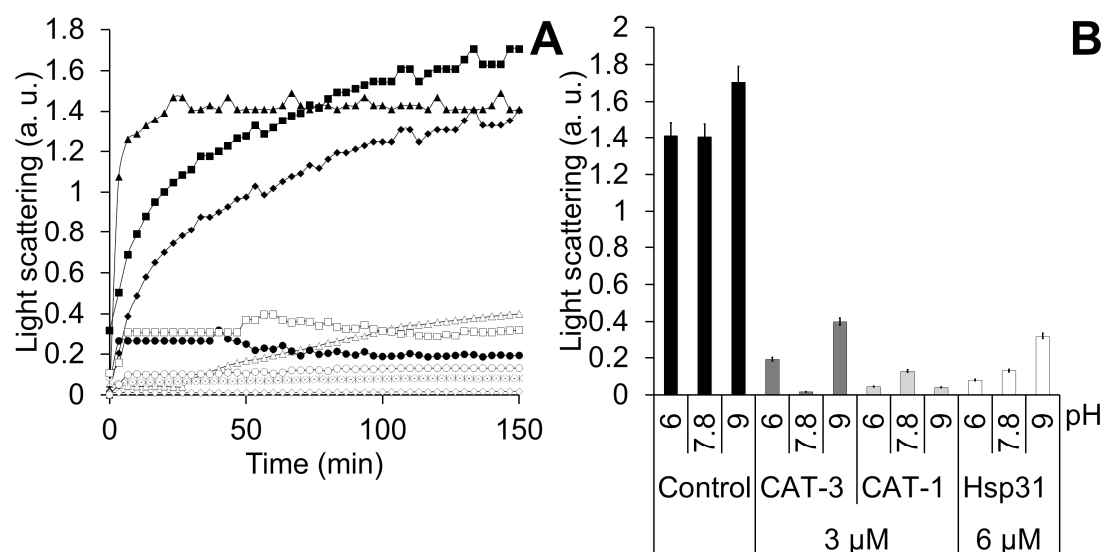

**Figure S4.** Unfolding activity of LSCs at various pH. A) LSCs effect on ADH heat denaturation (45°C) at various pHs. Light scattering at 360 nm generated by denaturation of ADH when incubated at 45°C. Control with BSA (6  $\mu$ M): at pH 6 (closed triangles), pH 7.8 (closed diamonds) and pH 9 (closed squares). In the presence of CAT-3 (3  $\mu$ M) at pH 6 (close circles), pH 7.8 (open diamonds) and pH 9 (open triangles). In the presence Hsp31 (6  $\mu$ M) at pH 6 (open circles), at pH 7.8 (asterisks) and pH 9 (open squares). B) Average of the final light scattering value from three independent experiments. Buffers used: 50 mM sodium phosphate at pH 6, 50 mM Na/K phosphate at pH 7.8, and 50 mM sodium borate at pH 9.

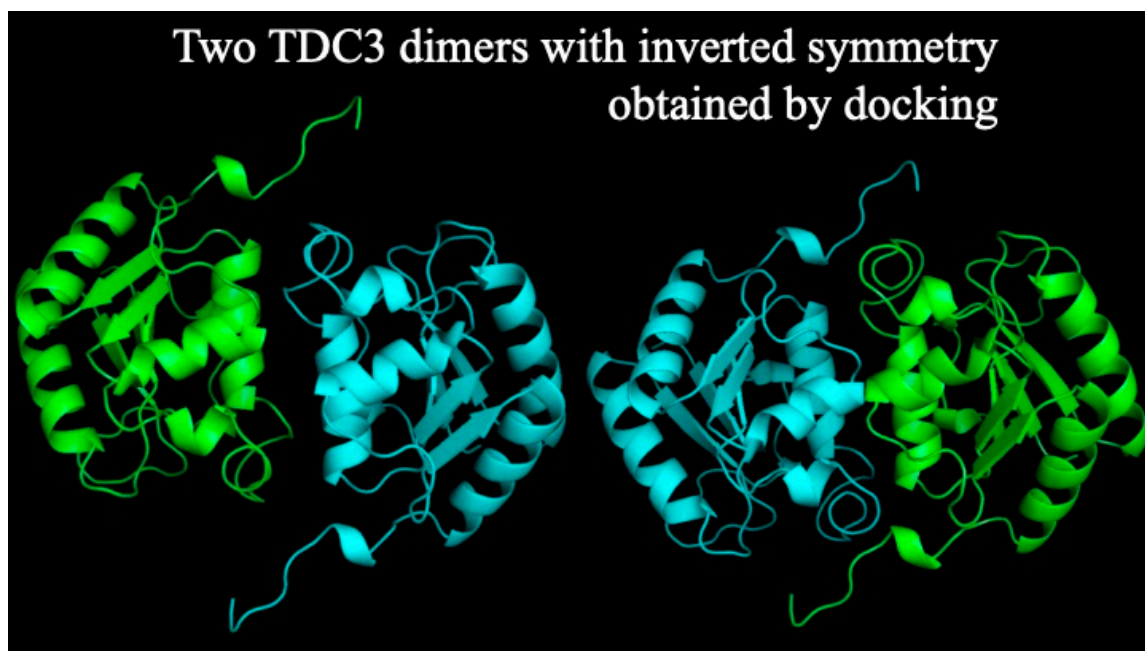

**Figure S5.** Formation by docking of TDC3 dimers with inverted symmetry which are similar to the dimers in CAT-3. We used the ClusPro server with standard parameters.
